# Supplementary material for: Adjustment of the performance and stability of isostructural zeolitic tetrazolate-imidazolate frameworks
Source: Royal Society of Chemistry journal article supplement (doi:10.1039/d0dt00791a), 2020-01-01
Supplement: d0dt00791a1.pdf [file d0dt00791a1.pdf]

## Supporting Information

### Adjustment of Performance and Stability in Isostructural Zeolitic Tetrazolate-Imidazolate Frameworks

Hai-Zhen Li<sup>1#</sup>, Dong-Ying Du<sup>2#</sup>, Yayong Sun<sup>1</sup>, Fei Wang<sup>1\*</sup> and Jian Zhang<sup>1</sup>

<sup>1</sup>State Key Laboratory of Structural Chemistry, Fujian Institute of Research on the Structure of Matter, the Chinese Academy of Sciences, Fuzhou, Fujian 350002, P. R. China. E-mail: wangfei04@fjirsm.ac.cn.

<sup>2</sup>National & Local United Engineering Lab for Power Battery, Department of Chemistry, Northeast Normal University, Changchun 130024, P. R. China.

## Experimental section

**Materials and instrumentation:** All reagents were purchased commercially and used without further purification. All syntheses were carried out in a 20 ml vial under autogenous pressure. All Powder X-ray diffraction analyses were recorded on a Rigaku Dmax2500 diffractometer with Cu K $\alpha$  radiation ( $\lambda$  = 1.54056 Å) with a step size of 5°. Thermal stability studies were carried out on a NETSCHZ STA-449C thermoanalyzer with a heating rate of 10 °C/min under a nitrogen atmosphere. Elemental analyses (C, H, N) were performed on a Flash EA 2000 elemental analyzer. <sup>1</sup>H NMR experiments were carried out on a Bruker spectrometer operating at resonance frequencies of 400 MHz. The gases adsorption isotherms were measured by using ASAP 2020 volumetric adsorption equipment.

**Synthesis of Zn(5-etz)<sub>0.84</sub>(2-mim)<sub>1.14</sub> (ZTIF-9):** The mixture of Zn(CH<sub>3</sub>CO<sub>2</sub>)<sub>2</sub>·2H<sub>2</sub>O (0.5 mmol, 0.110 g), 5-ethyltetrazole (Hetz, 0.5 mmol, 0.049 g), 2-methylimidazole (Hmim, 0.5 mmol, 0.041 g) in *N,N*-dimethylformamide (DMF, 2 mL) and ethanol (2 mL) was sealed in a 20 mL vial and heated to 120 °C for 3 days, and then cooled to room-temperature. The colorless polyhedral crystals were obtained, washed with ethanol, and dried at room temperature (Yield: 55%). Anal. Calcd for ZTIF-9 (activated): Calcd. C, 35.55; H, 4.18; N, 33.16; Found C, 35.33; H, 4.18; N, 33.09

**Synthesis of Zn(5-vtz)<sub>0.63</sub>(2-mim)<sub>1.37</sub> (ZTIF-10):** The mixture of Zn(CH<sub>3</sub>CO<sub>2</sub>)<sub>2</sub>·2H<sub>2</sub>O (0.5 mmol, 0.110 g), 5-vinyltetrazole (Hvtz, 0.5 mmol, 0.050 g), Hmim (0.5 mmol, 0.041 g) in DMF (2 mL) and ethanol (2 mL) was sealed in a 20 mL vial and heated to 120 °C for 3 days, and then cooled to room-temperature. The pale yellow polyhedral crystals were obtained, washed with ethanol, and dried at room temperature (Yield: 52%). Anal. Calcd for ZTIF-10 (activated): Calcd. C, 37.48; H, 3.73; N, 31.11; Found C, 37.59; H, 3.81; N, 30.71.

The co-existence of 5-etz and 2-mim in ZTIF-9 and 5-vtz and 2-mim in ZTIF-10 are proved by  $^1\text{H}$  NMR. In combination with elemental analysis (EA) results, the ratio of Hetz to Hmim is 3:4 in ZTIF-9, And 5:11 in ZTIF-10.

**Table S1.** Crystallographic Data and Structure Refinement Details for **ZTIF-9** and **ZTIF-10**.

| <b>Compounds</b>                                                            | <b>ZTIF-9</b>                                        | <b>ZTIF-10</b>                                       |
|-----------------------------------------------------------------------------|------------------------------------------------------|------------------------------------------------------|
| Formula                                                                     | $\text{C}_{50}\text{H}_{70}\text{N}_{40}\text{Zn}_7$ | $\text{C}_{59}\text{H}_{70}\text{N}_{42}\text{Zn}_8$ |
| Formula weight                                                              | 1689.22                                              | 1890.74                                              |
| Crystal system                                                              | Cubic                                                | Cubic                                                |
| Space group                                                                 | <i>I</i> -43 <i>m</i>                                | <i>I</i> -43 <i>m</i>                                |
| <i>a</i> (Å)                                                                | 17.0156(7)                                           | 17.0183(5)                                           |
| <i>b</i> (Å)                                                                | 17.0156(7)                                           | 17.0183(5)                                           |
| <i>c</i> (Å)                                                                | 17.0156(7)                                           | 17.0183(5)                                           |
| $\alpha$ (°)                                                                | 90                                                   | 90                                                   |
| $\beta$ (°)                                                                 | 90                                                   | 90                                                   |
| $\gamma$ (°)                                                                | 90                                                   | 90                                                   |
| <i>V</i> (Å <sup>3</sup> )                                                  | 4926.6(6)                                            | 4928.9(3)                                            |
| <i>Z</i>                                                                    | 12                                                   | 12                                                   |
| $\mu$ (Mo <i>Ka</i> ) (mm <sup>-1</sup> )                                   | 1.939                                                | 1.938                                                |
| <i>F</i> (000)                                                              | 1416.0                                               | 1416.0                                               |
| Temperature (K)                                                             | 100                                                  | 100                                                  |
| Observed data [ <i>I</i> > 2σ( <i>I</i> )]                                  | 2188                                                 | 2269                                                 |
| <i>R</i> <sub>int</sub>                                                     | 0.0269                                               | 0.0110                                               |
| Data/restraints/parameters                                                  | 810/0/39                                             | 780/7/42                                             |
| <i>R</i> <sub>1</sub> , <i>wR</i> <sub>2</sub> [ <i>I</i> > 2σ( <i>I</i> )] | 0.0544, 0.1653                                       | 0.0256, 0.0772                                       |
| <i>R</i> <sub>1</sub> , <i>wR</i> <sub>2</sub> (all data)                   | 0.0563, 0.1661                                       | 0.0258, 0.0777                                       |
| Goodness-of-fit on <i>F</i> <sup>2</sup>                                    | 1.135                                                | 1.107                                                |
| CCDC No.                                                                    | 1961700                                              | 1961701                                              |

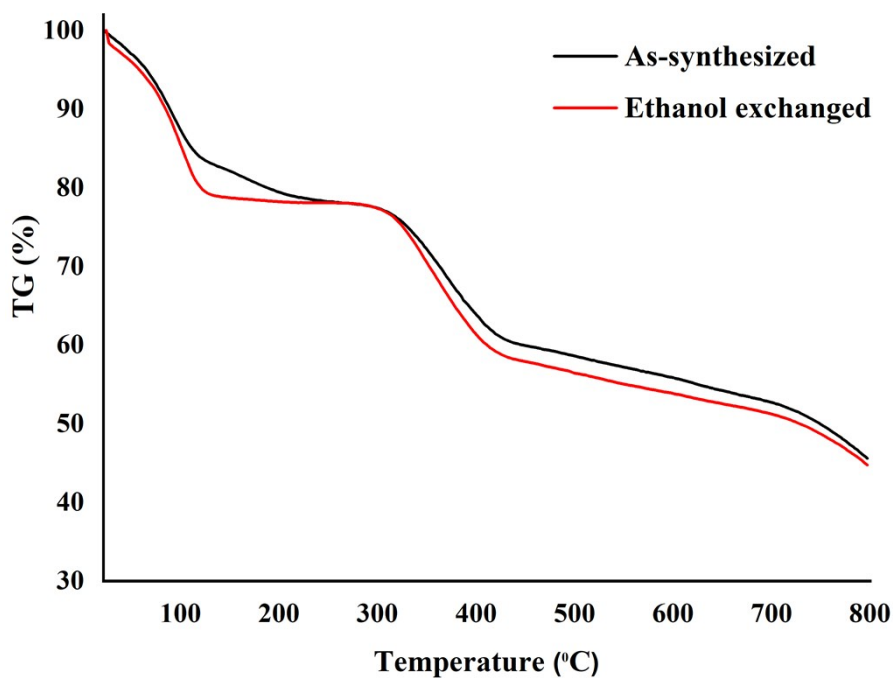

**Figure S1.** The TG plots of **ZTIF-9** under different conditions.

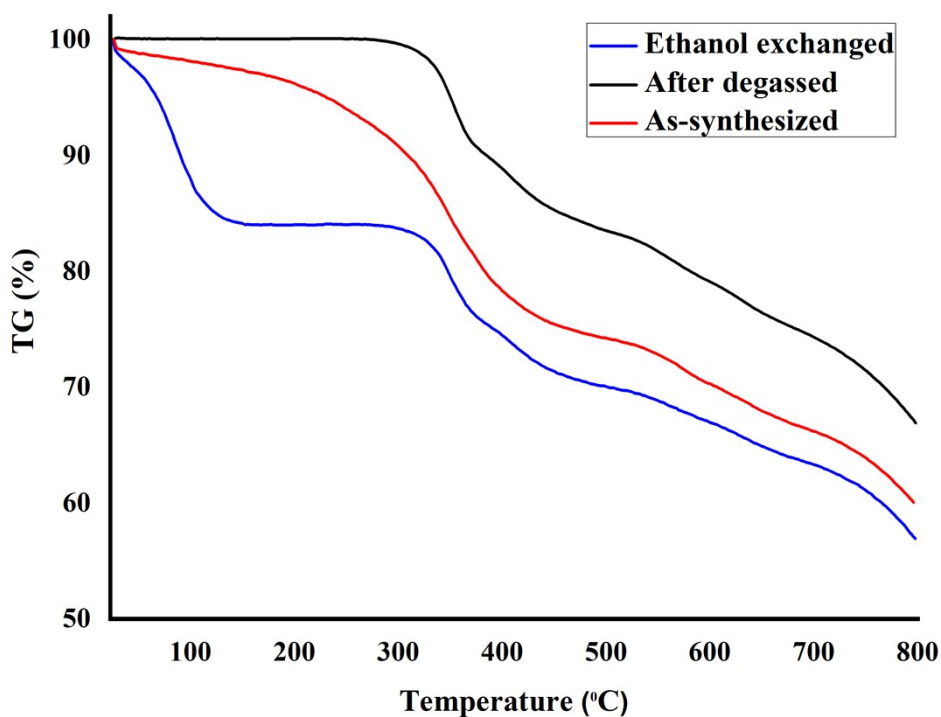

**Figure S2.** The TG plots of **ZTIF-10** under different conditions.

The TGA traces of the ZTIF-9 and ZTIF-10 samples and the samples after being immersed in dry ethanol solvents at 60 °C for three days are shown in Figure S1 and Figure S2, showing effective solvent-exchange. In particular, in the TGA trace of ethanol-exchanged samples of ZTIF-10, the initial

gradual weight-loss step of 10.6% till 325 °C were replaced by a small initial step (16.6% of weight loss) at 125 °C temperature, a plateau to ca. 325 °C and a sharp weight loss from that point onwards indicates the decomposition of the material. The TGA trace of ethanol-exchanged samples after degassed shows that the samples were fully activated. Similarly, for ZTIF-9 after ethanol exchanged, a small initial step (13.0% of weight loss) at 134 °C temperature, a plateau to ca. 290 °C and a sharp weight loss from that point onwards indicates the decomposition of the material.

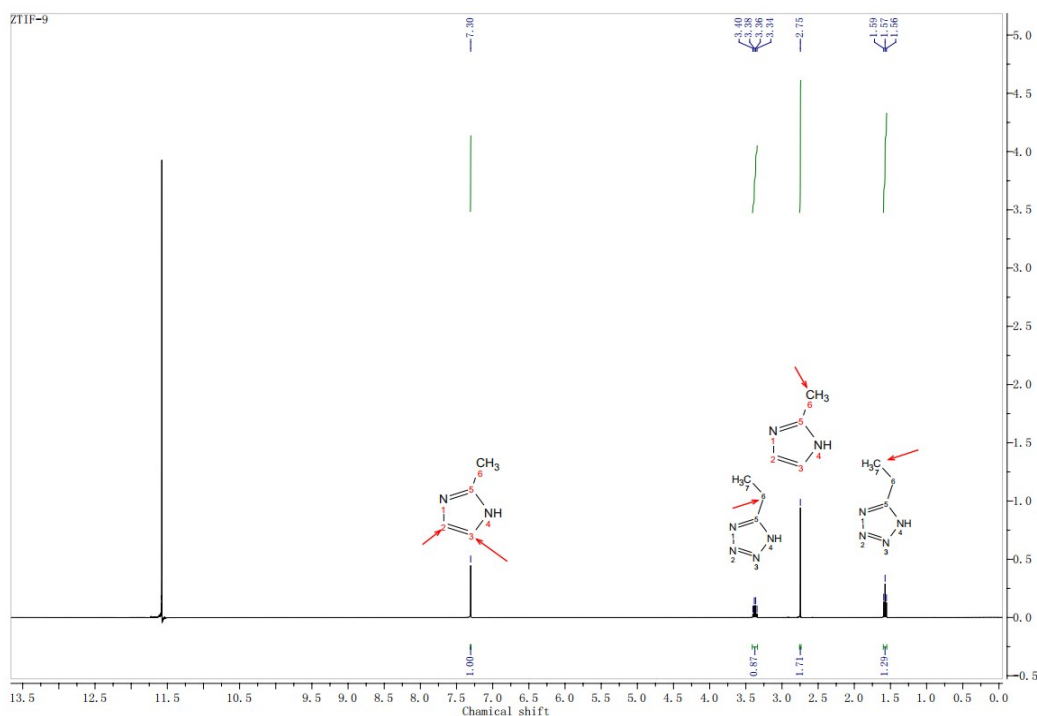

**Figure S3.** The <sup>1</sup>H NMR spectra of ZTIF-9 in CF<sub>3</sub>COOD solvent.

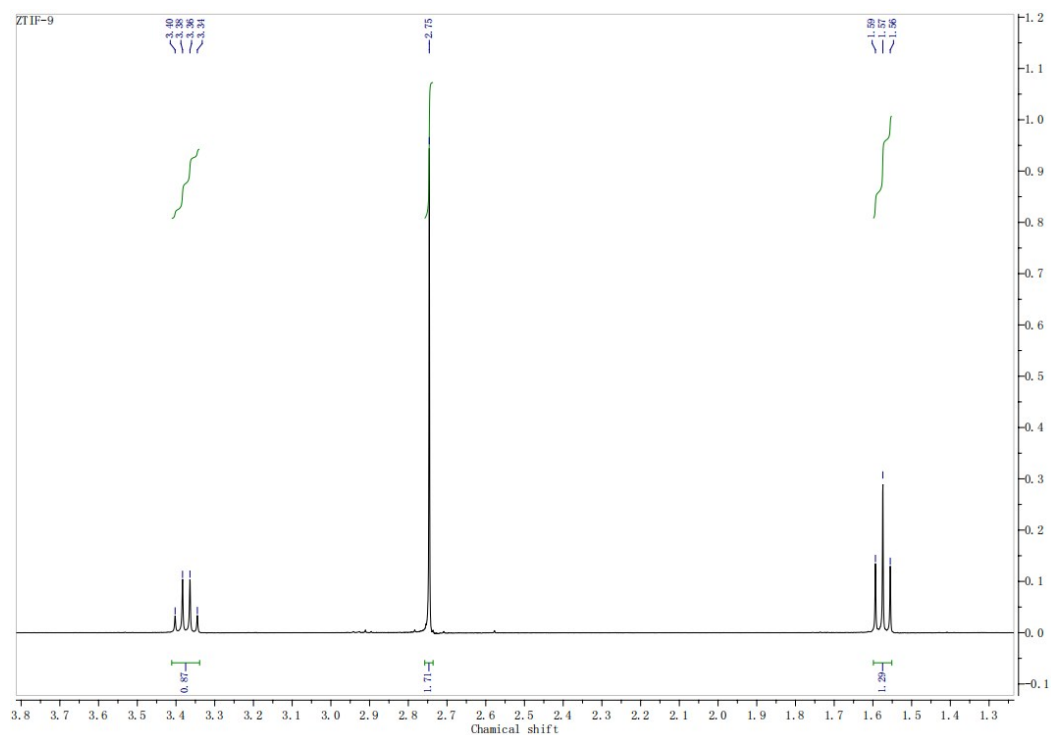

**Figure S4.** The high field zone  $^1\text{H}$ NMR spectra of **ZTIF-9** in  $\text{CF}_3\text{COOD}$  solvent.

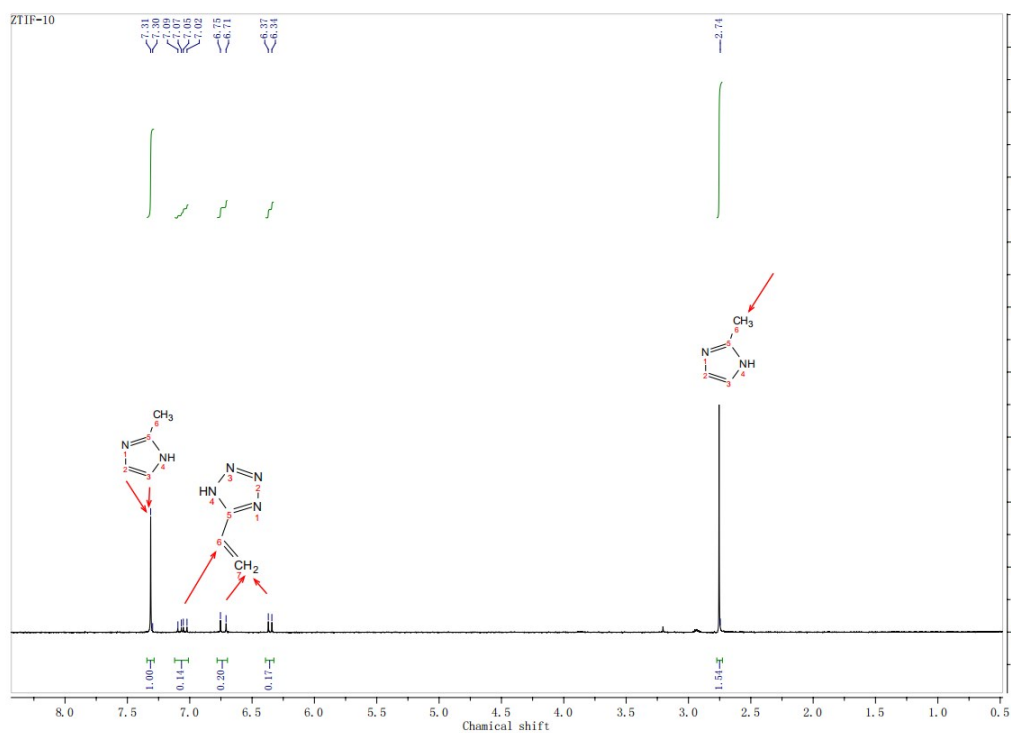

**Figure S5.** The  $^1\text{H}$ NMR spectra of **ZTIF-10** in  $\text{CF}_3\text{COOD}$  solvent.

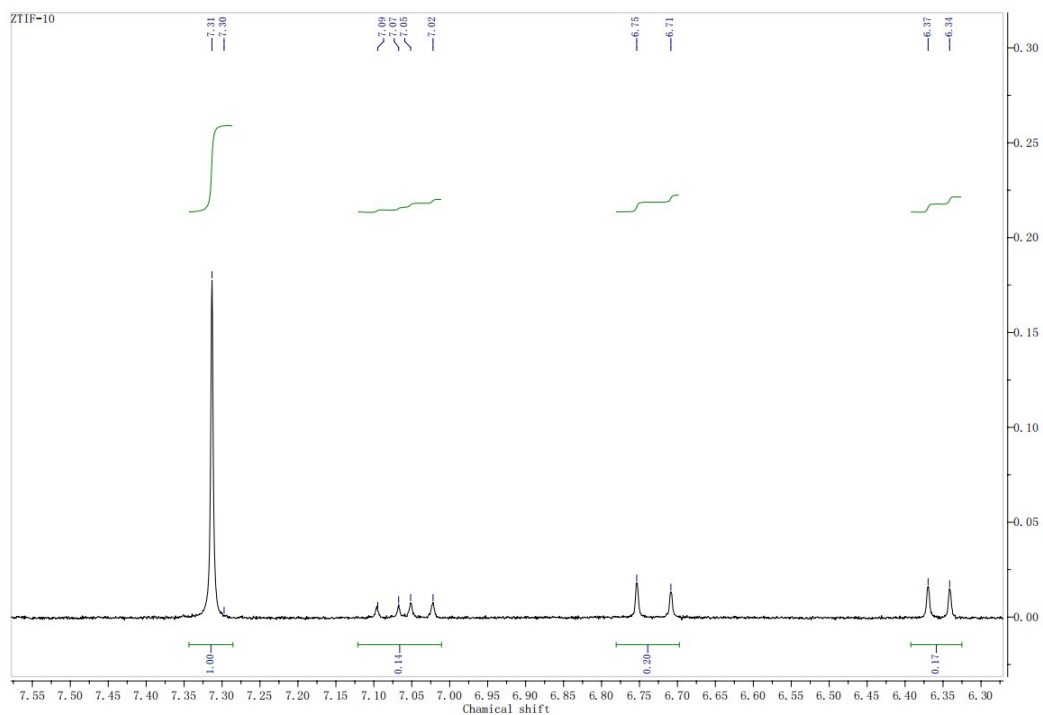

**Figure S6.** The low field zone  $^1\text{H}$ NMR spectra of **ZTIF-10** in  $\text{CF}_3\text{COOD}$  solvent.

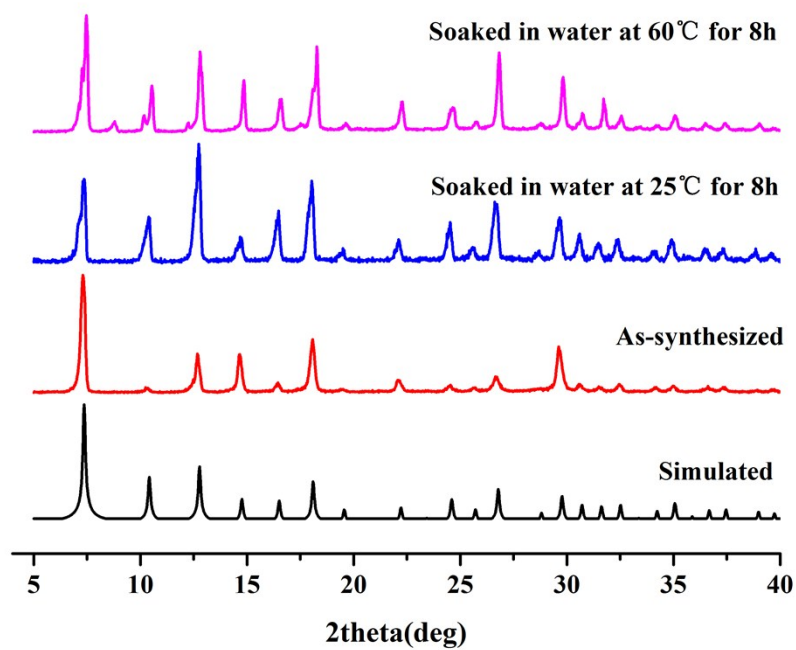

**Figure S7.** The powder XRD patterns of **ZTIF-1** soaked in water.

**Table S2.** The gas uptake summary of ZTIF-9 and ZTIF-10

| Gas(ml/g)<br>T(K) | C <sub>2</sub> H <sub>2</sub> | CO <sub>2</sub> |
|-------------------|-------------------------------|-----------------|
| 273(ZTIF-9)       | 88.6                          | 55.3            |
| 298(ZTIF-9)       | 46.5                          | 27.3            |
| 273(ZTIF-10)      | 65.2                          | 37.3            |
| 298(ZTIF-10)      | 36.9                          | 26.7            |

**Isosteric heat of gas adsorption**

The gas sorption data for ZTIFs measured up to 1 bar at different temperatures were fitted by the virial equation (1) to estimate the enthalpy of adsorption.

$$\ln(P) = \ln(N) + 1/T(a_0 + a_1N + a_2N^2 + \dots) + (b_0 + b_1N + b_2N^2 + b_3N^3 + \dots) \quad (1)$$

Where  $P$  is the pressure,  $N$  is the amount adsorbed,  $T$  is the temperature,  $a_0, a_1, a_2, \dots$  and  $b_0, b_1, b_2, \dots$  are the temperature independent empirical parameters.

The isosteric heat of adsorption was estimated from the following equation (2) as a function of gas uptake.

$$Q_{st} = -R(A_0 + A_1n + A_2n^2 + \dots) \quad (2)$$

Here,  $Q_{st}$  is the coverage-dependent isosteric heat of adsorption and  $R$  is the universal gas constant of 8.314 J K<sup>-1</sup>mol<sup>-1</sup>.

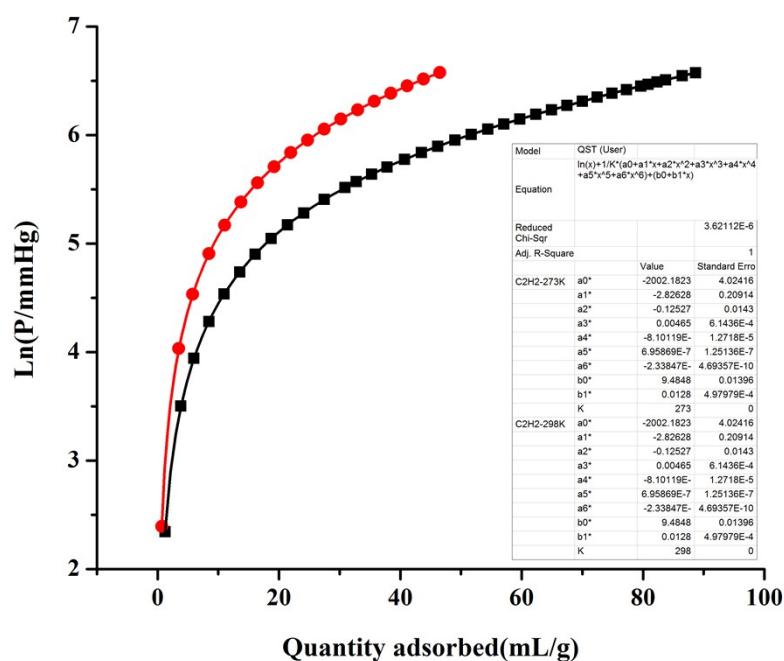

**Figure S8.** The C<sub>2</sub>H<sub>2</sub> sorption isotherms for **ZTIF-9** fitting by virial method.

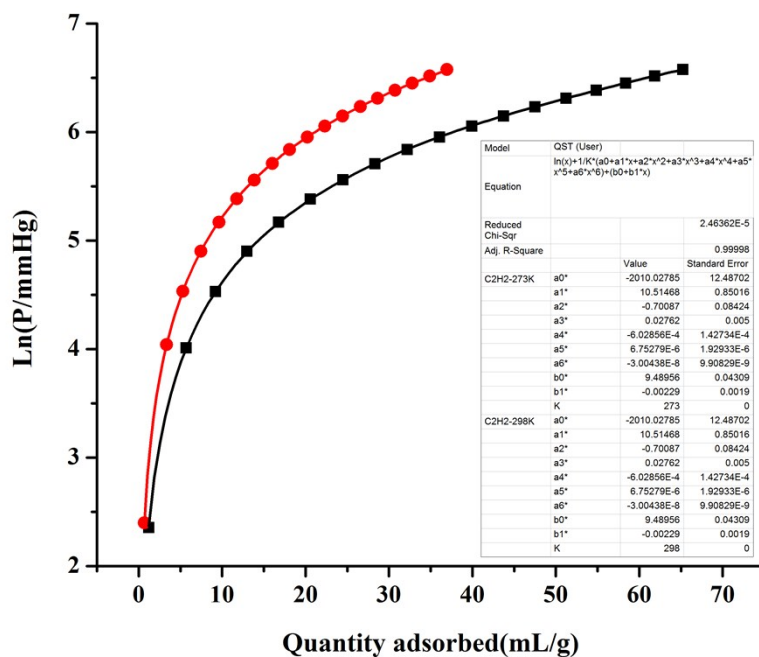

**Figure S9.** The C<sub>2</sub>H<sub>2</sub> sorption isotherms for **ZTIF-10** fitting by virial method.



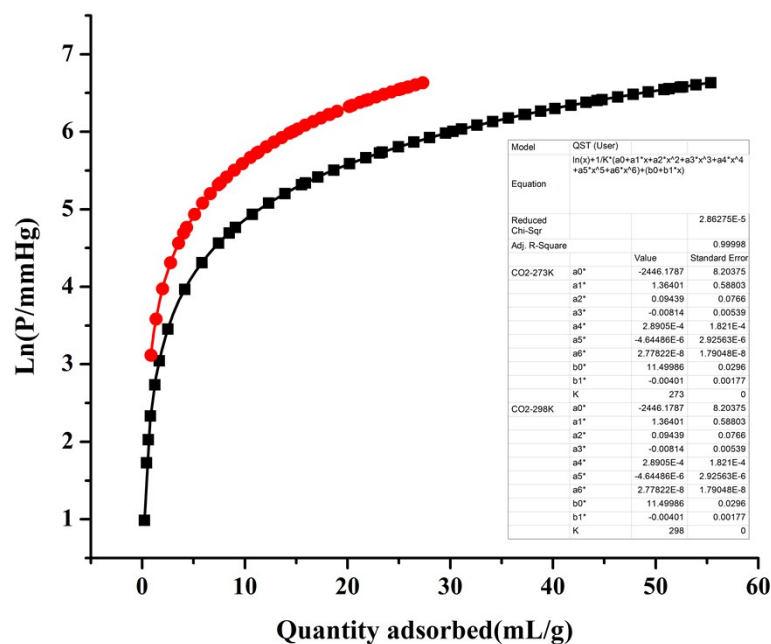

**Figure S10.** The CO<sub>2</sub> sorption isotherms for **ZTIF-9** fitting by virial method.

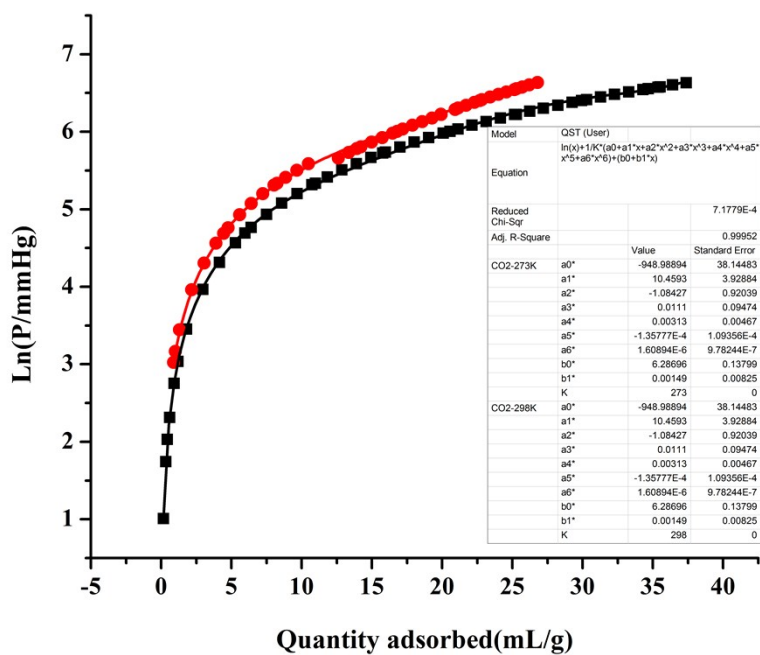

**Figure S11.** The CO<sub>2</sub> sorption isotherms for **ZTIF-10** fitting by virial method.

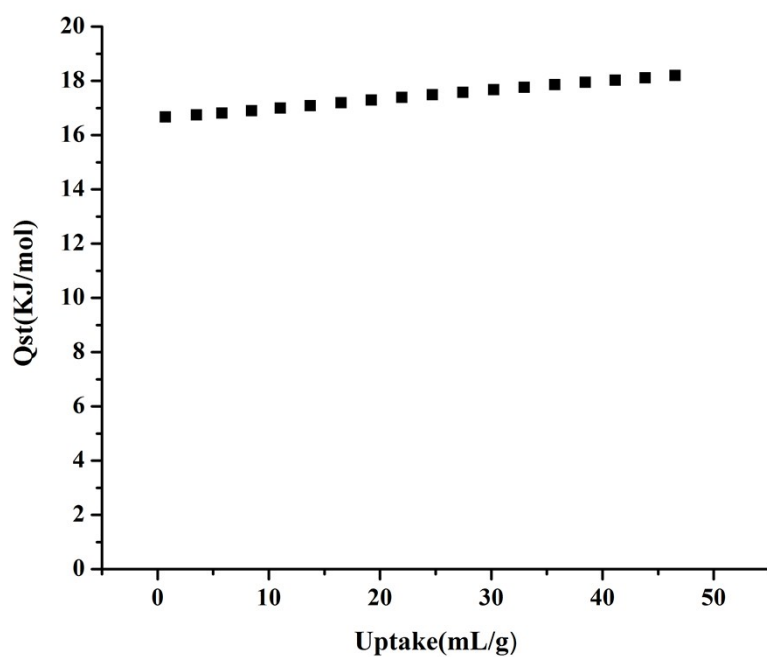

**Figure S12.** Isosteric heat of C<sub>2</sub>H<sub>2</sub> adsorption of **ZTIF-9**.

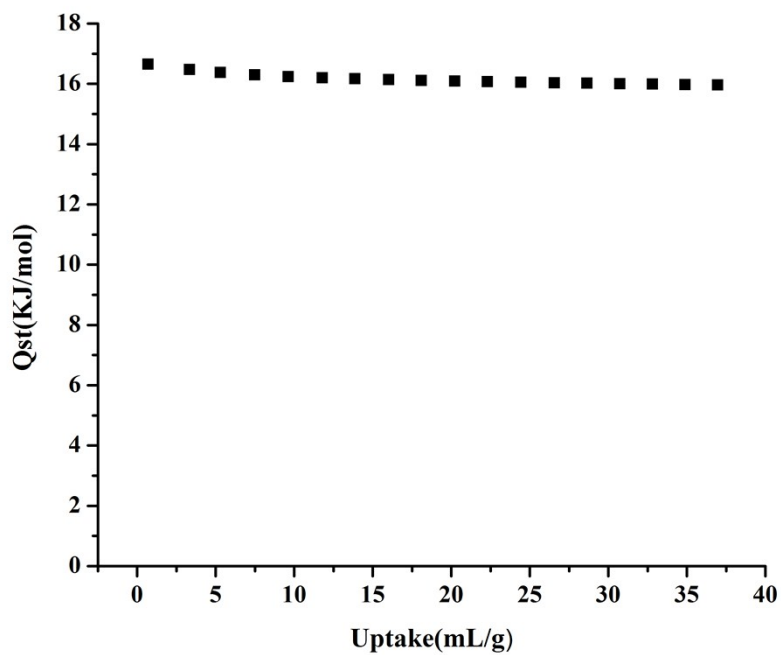

**Figure S13.** Isosteric heat of C<sub>2</sub>H<sub>2</sub> adsorption of **ZTIF-10**.

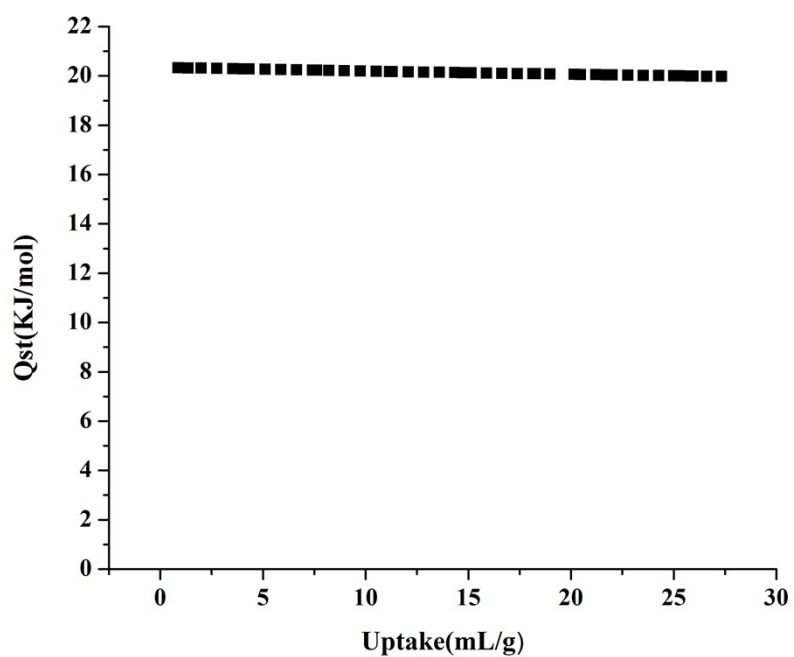

**Figure S14.** Isosteric heat of CO<sub>2</sub> adsorption of **ZTIF-9**.

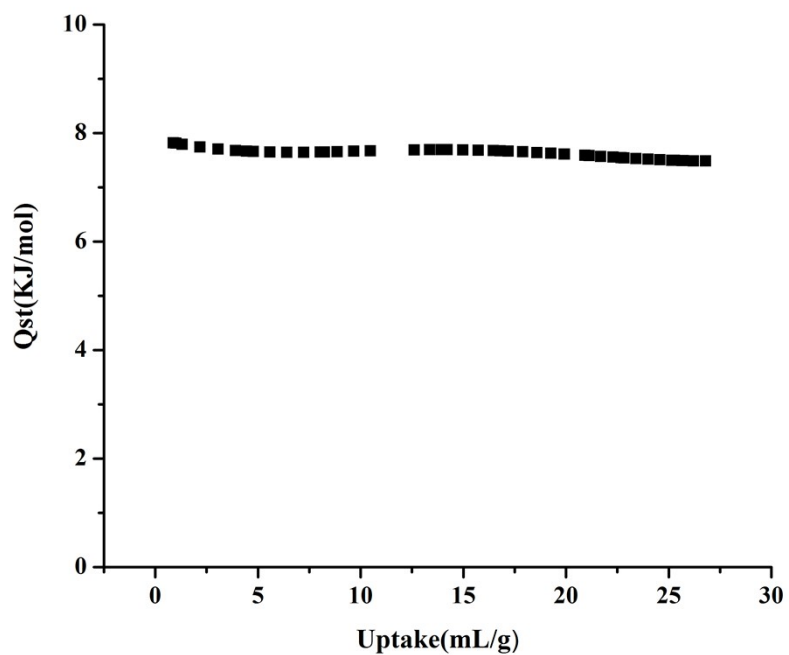

**Figure S15.** Isosteric heat of CO<sub>2</sub> adsorption of **ZTIF-10**.
